# Supplementary material for: Bacterial microbiota of Aedes aegypti mosquito larvae is altered by intoxication with Bacillus thuringiensis israelensis
Source: PubMed Central journal article supplement (PMC5834902; doi:10.1186/s13071-018-2741-8), 2018-03-02

**Additional file 1: Figure S1.** Picture of the DGGE gel containing unexposed larvae sampled at 0, 5, 10 and 24 h.

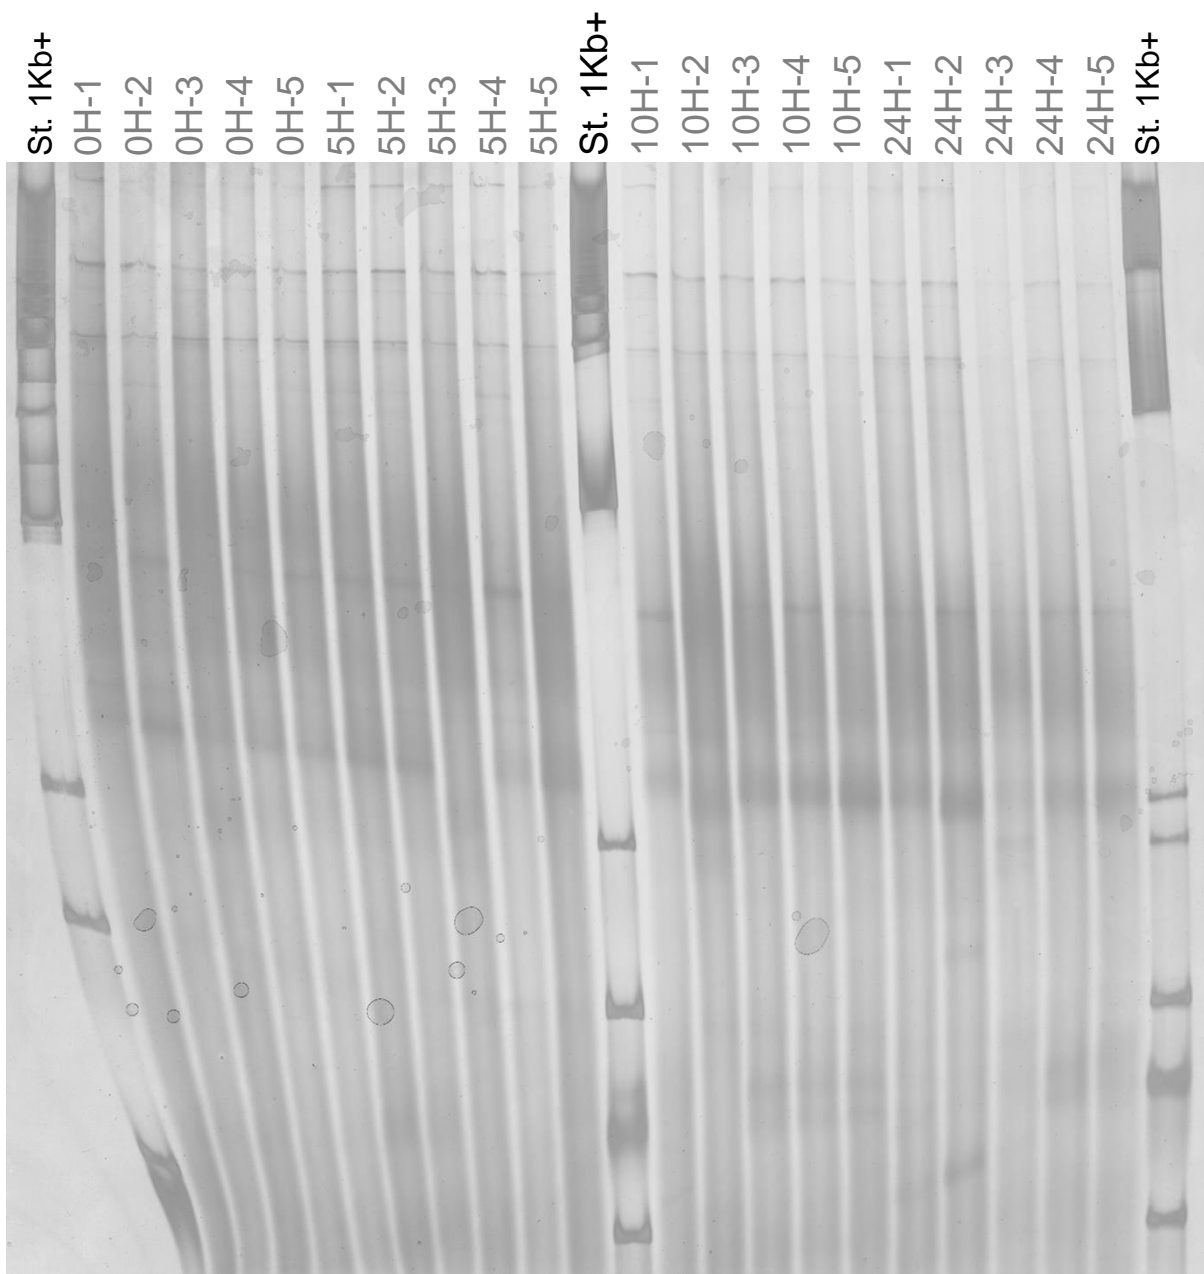

Supplement: 13071_2018_2741_MOESM1_ESM.pdf [file 13071_2018_2741_MOESM1_ESM.pdf]
