# Supplementary material for: Bacterial microbiota of Aedes aegypti mosquito larvae is altered by intoxication with Bacillus thuringiensis israelensis
Source: PubMed Central journal article supplement (PMC5834902; doi:10.1186/s13071-018-2741-8), 2018-03-02
Supplement: 13071_2018_2741_MOESM4_ESM.pdf [file 13071_2018_2741_MOESM4_ESM.pdf]

**Additional file 4: Table S2.** Band counting numbers, Shannon index (diversity), Simpson index (diversity) and Pielou's index (evenness). They are based on DGGE band-matching surfaces. Results are for larvae never exposed to *Bacillus thuringiensis israelensis* (Bti) ("Control") and for larvae exposed to Bti, including larvae dead in less than 6 h of exposure to Bti ("Susceptible"), in between 6 and 11 h ("Intermediate"), and past 11 h ("Tolerant"). Results are given with mean ( $\pm$  standard deviation) (minimum-maximum values).

|              | <b>Number of bands</b>     | <b>Shannon's diversity</b><br>H' = $-\sum(P_i \cdot \log(P_i))$<br>Log base e | <b>Simpson's diversity</b><br>$1 - \lambda' = 1 - \sum(N_i(N_i - 1) / (N(N - 1)))$<br>with N = total individuals | <b>Pielou's evenness</b><br>J' = $H' / \log(S)$<br>with S = total species |
|--------------|----------------------------|-------------------------------------------------------------------------------|------------------------------------------------------------------------------------------------------------------|---------------------------------------------------------------------------|
| Control      | 11.5 ( $\pm$ 2.67) (7-16)  | 2.4 ( $\pm$ 0.25) (1.9-2.8)                                                   | 0.96 ( $\pm$ 0.02) (0.92-0.98)                                                                                   | 1.0 ( $\pm$ <0.001)                                                       |
| Susceptible  | 16.6 ( $\pm$ 1.87) (12-19) | 2.8 ( $\pm$ 0.12) (2.5-2.9)                                                   | 0.98 ( $\pm$ 0.005) (0.96-0.98)                                                                                  | 1.0 ( $\pm$ <0.003)                                                       |
| Intermediate | 15.9 ( $\pm$ 2.42) (12-20) | 2.7 ( $\pm$ 0.15) (2.5-3.0)                                                   | 0.98 ( $\pm$ 0.006) (0.96-0.98)                                                                                  | 1.0 ( $\pm$ <0.001)                                                       |
| Tolerant     | 7.9 ( $\pm$ 2.11) (4-11)   | 2.0 ( $\pm$ 0.29) (1.4-2.4)                                                   | 0.93 ( $\pm$ 0.03) (0.84-0.96)                                                                                   | 1.0 ( $\pm$ <0.005)                                                       |
